# Supplementary material for: The expanding spectrum of neurological disorders of phosphoinositide metabolism
Source: PubMed Central journal article supplement (PMC6737944; doi:10.1242/dmm.038174), 2019-08-13
Supplement: dmm-12-038174-s1.pdf [file dmm-12-038174-s1.pdf]

**Table S1.** Comprehensive list of PtdIns/PIP kinase genes (and regulatory subunits), PIP phosphatase genes, and genes containing PIP-binding domains that are associated with a monogenic disorder. Only disorders with confirmed (by peer-reviewed literature) or with provisional status on OMIM are listed. Genes with PIP-binding domains were sourced from InterPro.

[Click here to Download Table S1](#)

**Table S2.** List of Mendelian disorders and list of genes encoding PIP-modulating genes (i.e. PIP kinases, PIP phosphatases, and proteins with PIP-binding domains).

[Click here to Download Table S2](#)
